# Supplementary material
Source: Research Square preprint supplement (doi:10.21203/rs.3.rs-9645975/v1)
Supplement: Supplementary file 1 [file 97228a62ac63ece79c26882d.docx]

**SUPPLEMENTARY MATERIAL**

**Fig. S1** Endogenous *Fkrp* expression in non-injected WT muscle. **a** Schematic representation of experimental design for *in vivo* administration of AAV9 vectors coding for FKRP, SeAP and non-coding vector 3’-Dysf in WT mice. **b** Quantification of endogenous *Fkrp* mRNA by RT-qPCR in non-injected gastrocnemius muscle (GA) of PBS or AAV9 injected mice in TA, shown as FC relative to PBS injected mice, normalized to *Rplp0*. Analysis was performed using one-way ANOVA. Data are shown as mean ± standard error of the mean (n = 3 mice per group). ns, not significant, *p<0.05, **p<0.01, ***p<0.001


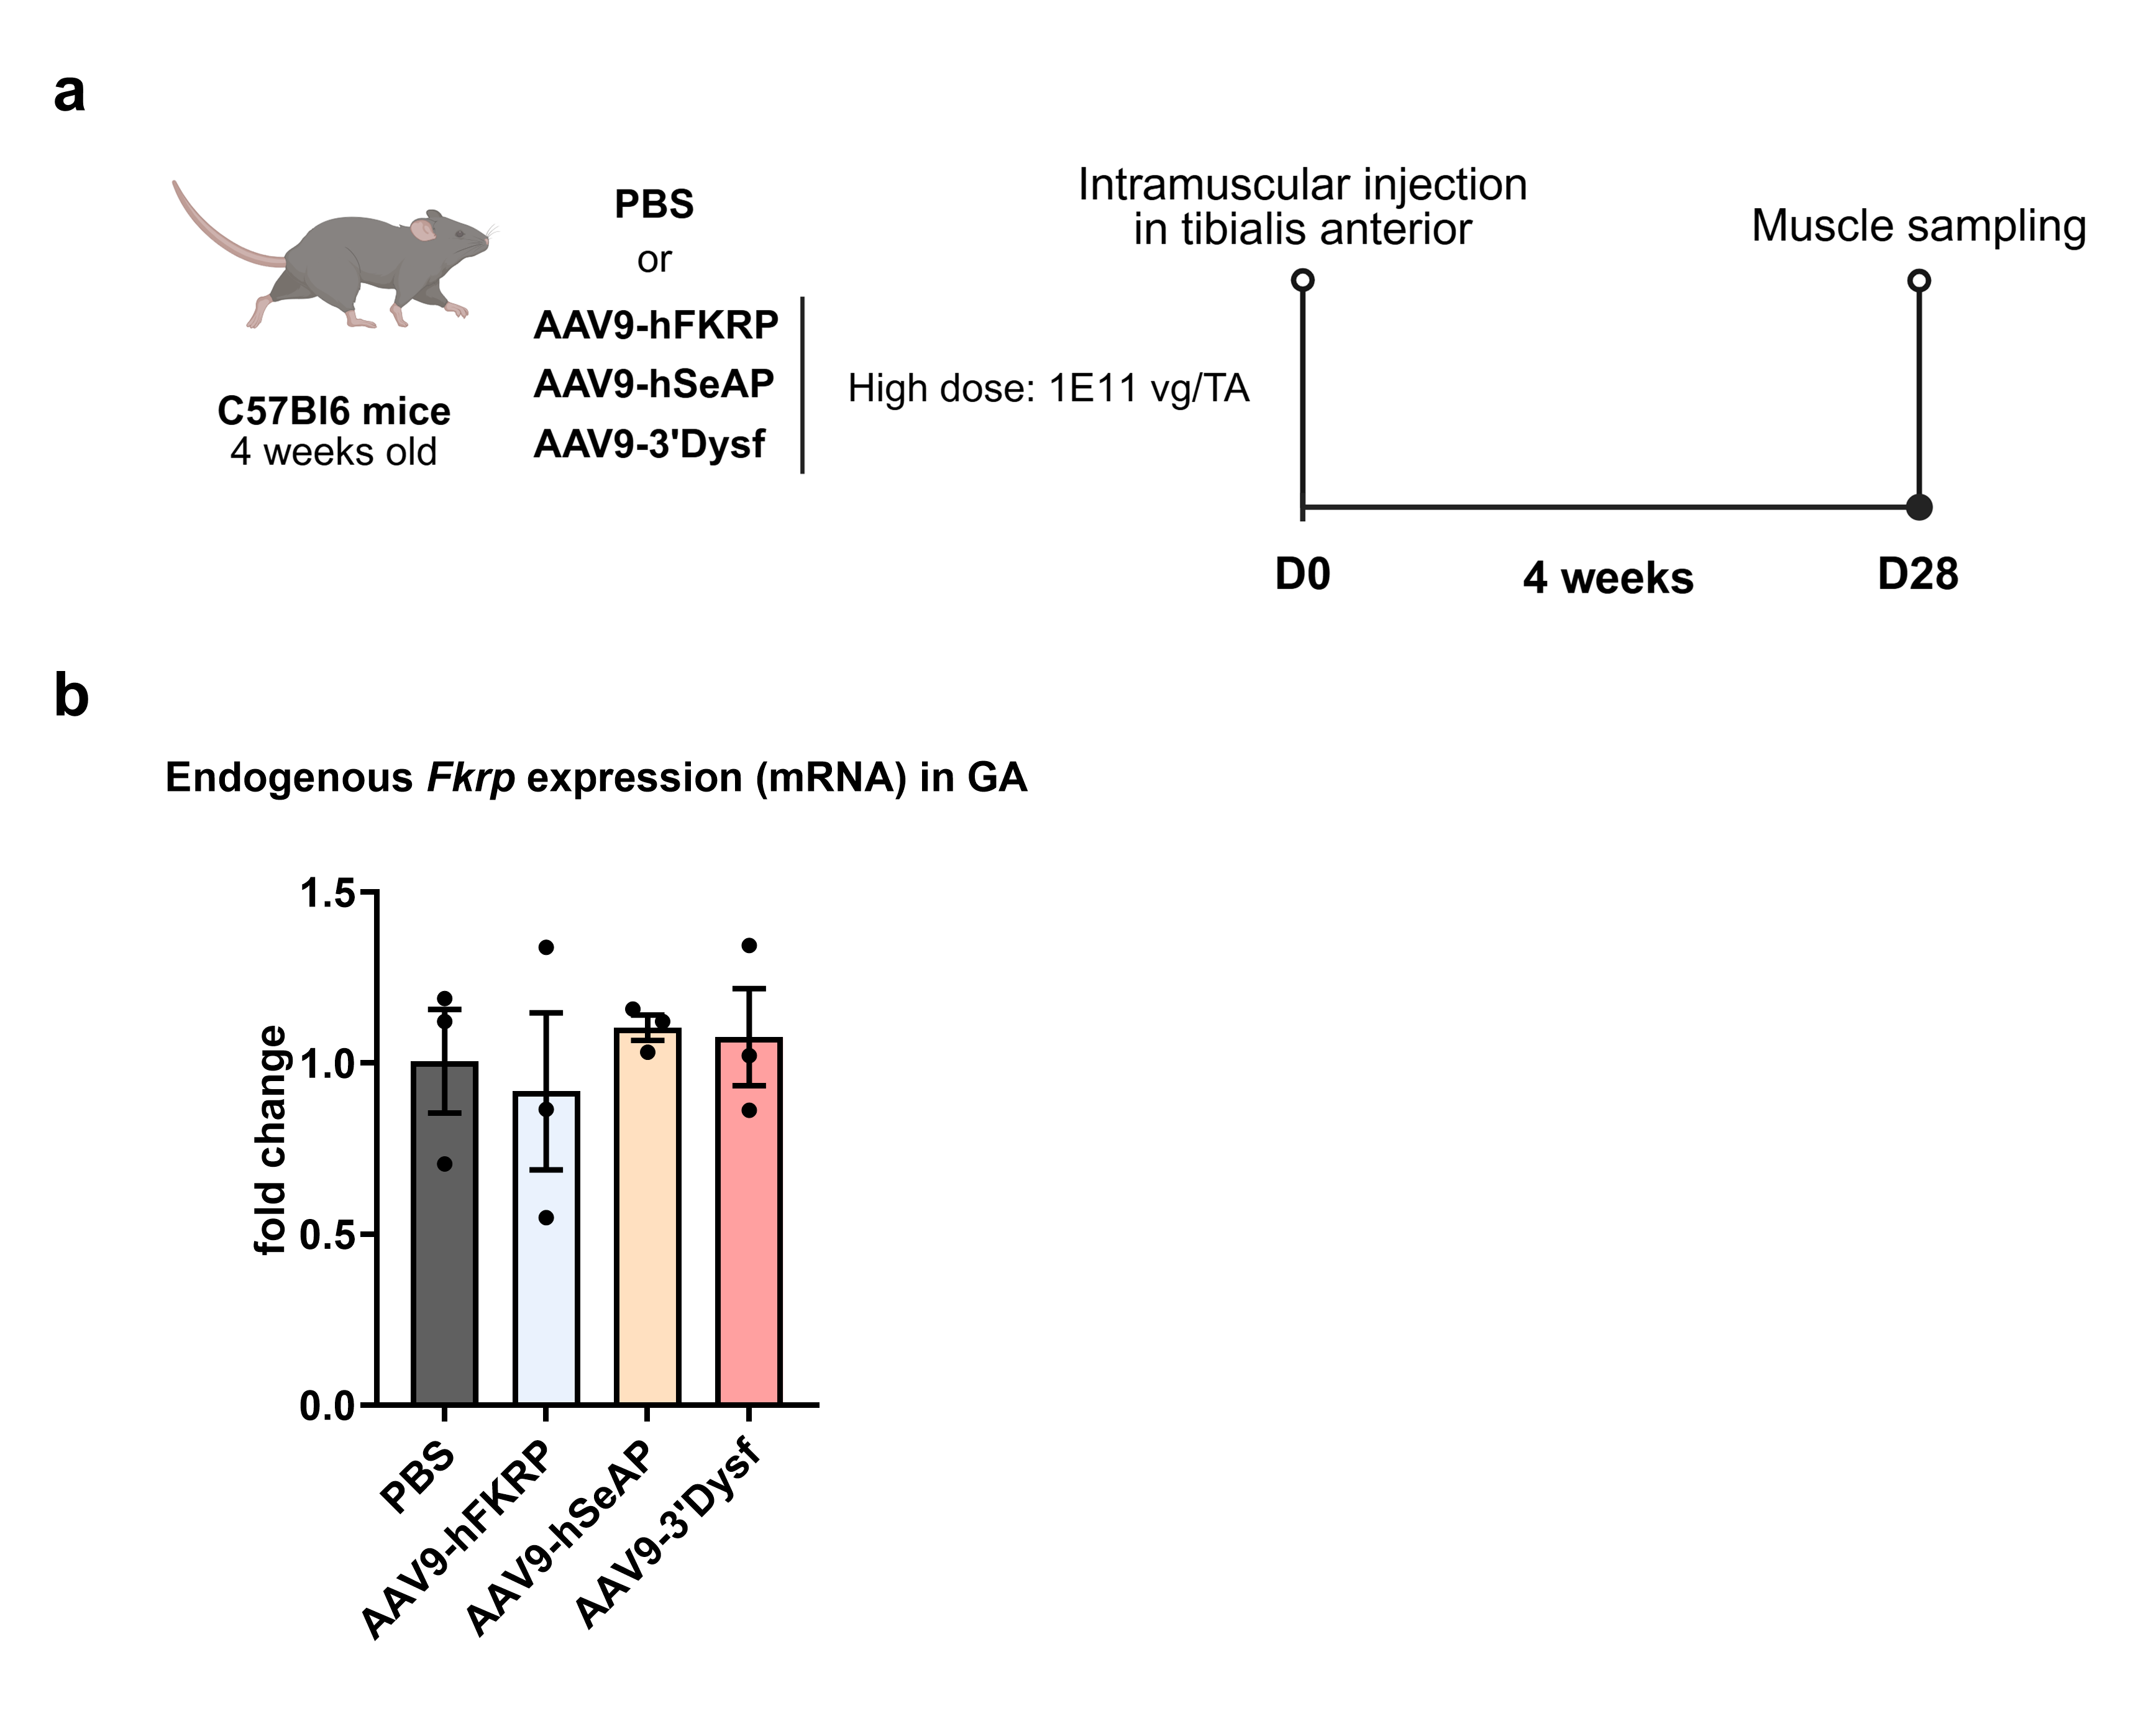


**Fig. S2** Endogenous *Fkrp* expression in TA of IV injected WT mice. **a** Schematic representation of experimental design for *in vivo* administration of AAV9 vectors coding for FKRP, GFP and non-coding vector 3’-Dysf in WT mice. **b** Quantification of endogenous *Fkrp* mRNA by RT-qPCR in PBS or AAV9 injected WT mice, shown as FC relative to PBS injected mice, normalized to *Rplp0*. Analysis was performed using one-way ANOVA. Data are shown as mean ± standard error of the mean (n = 5 mice per group). ns, not significant, *p<0.05, **p<0.01, ***p<0.001


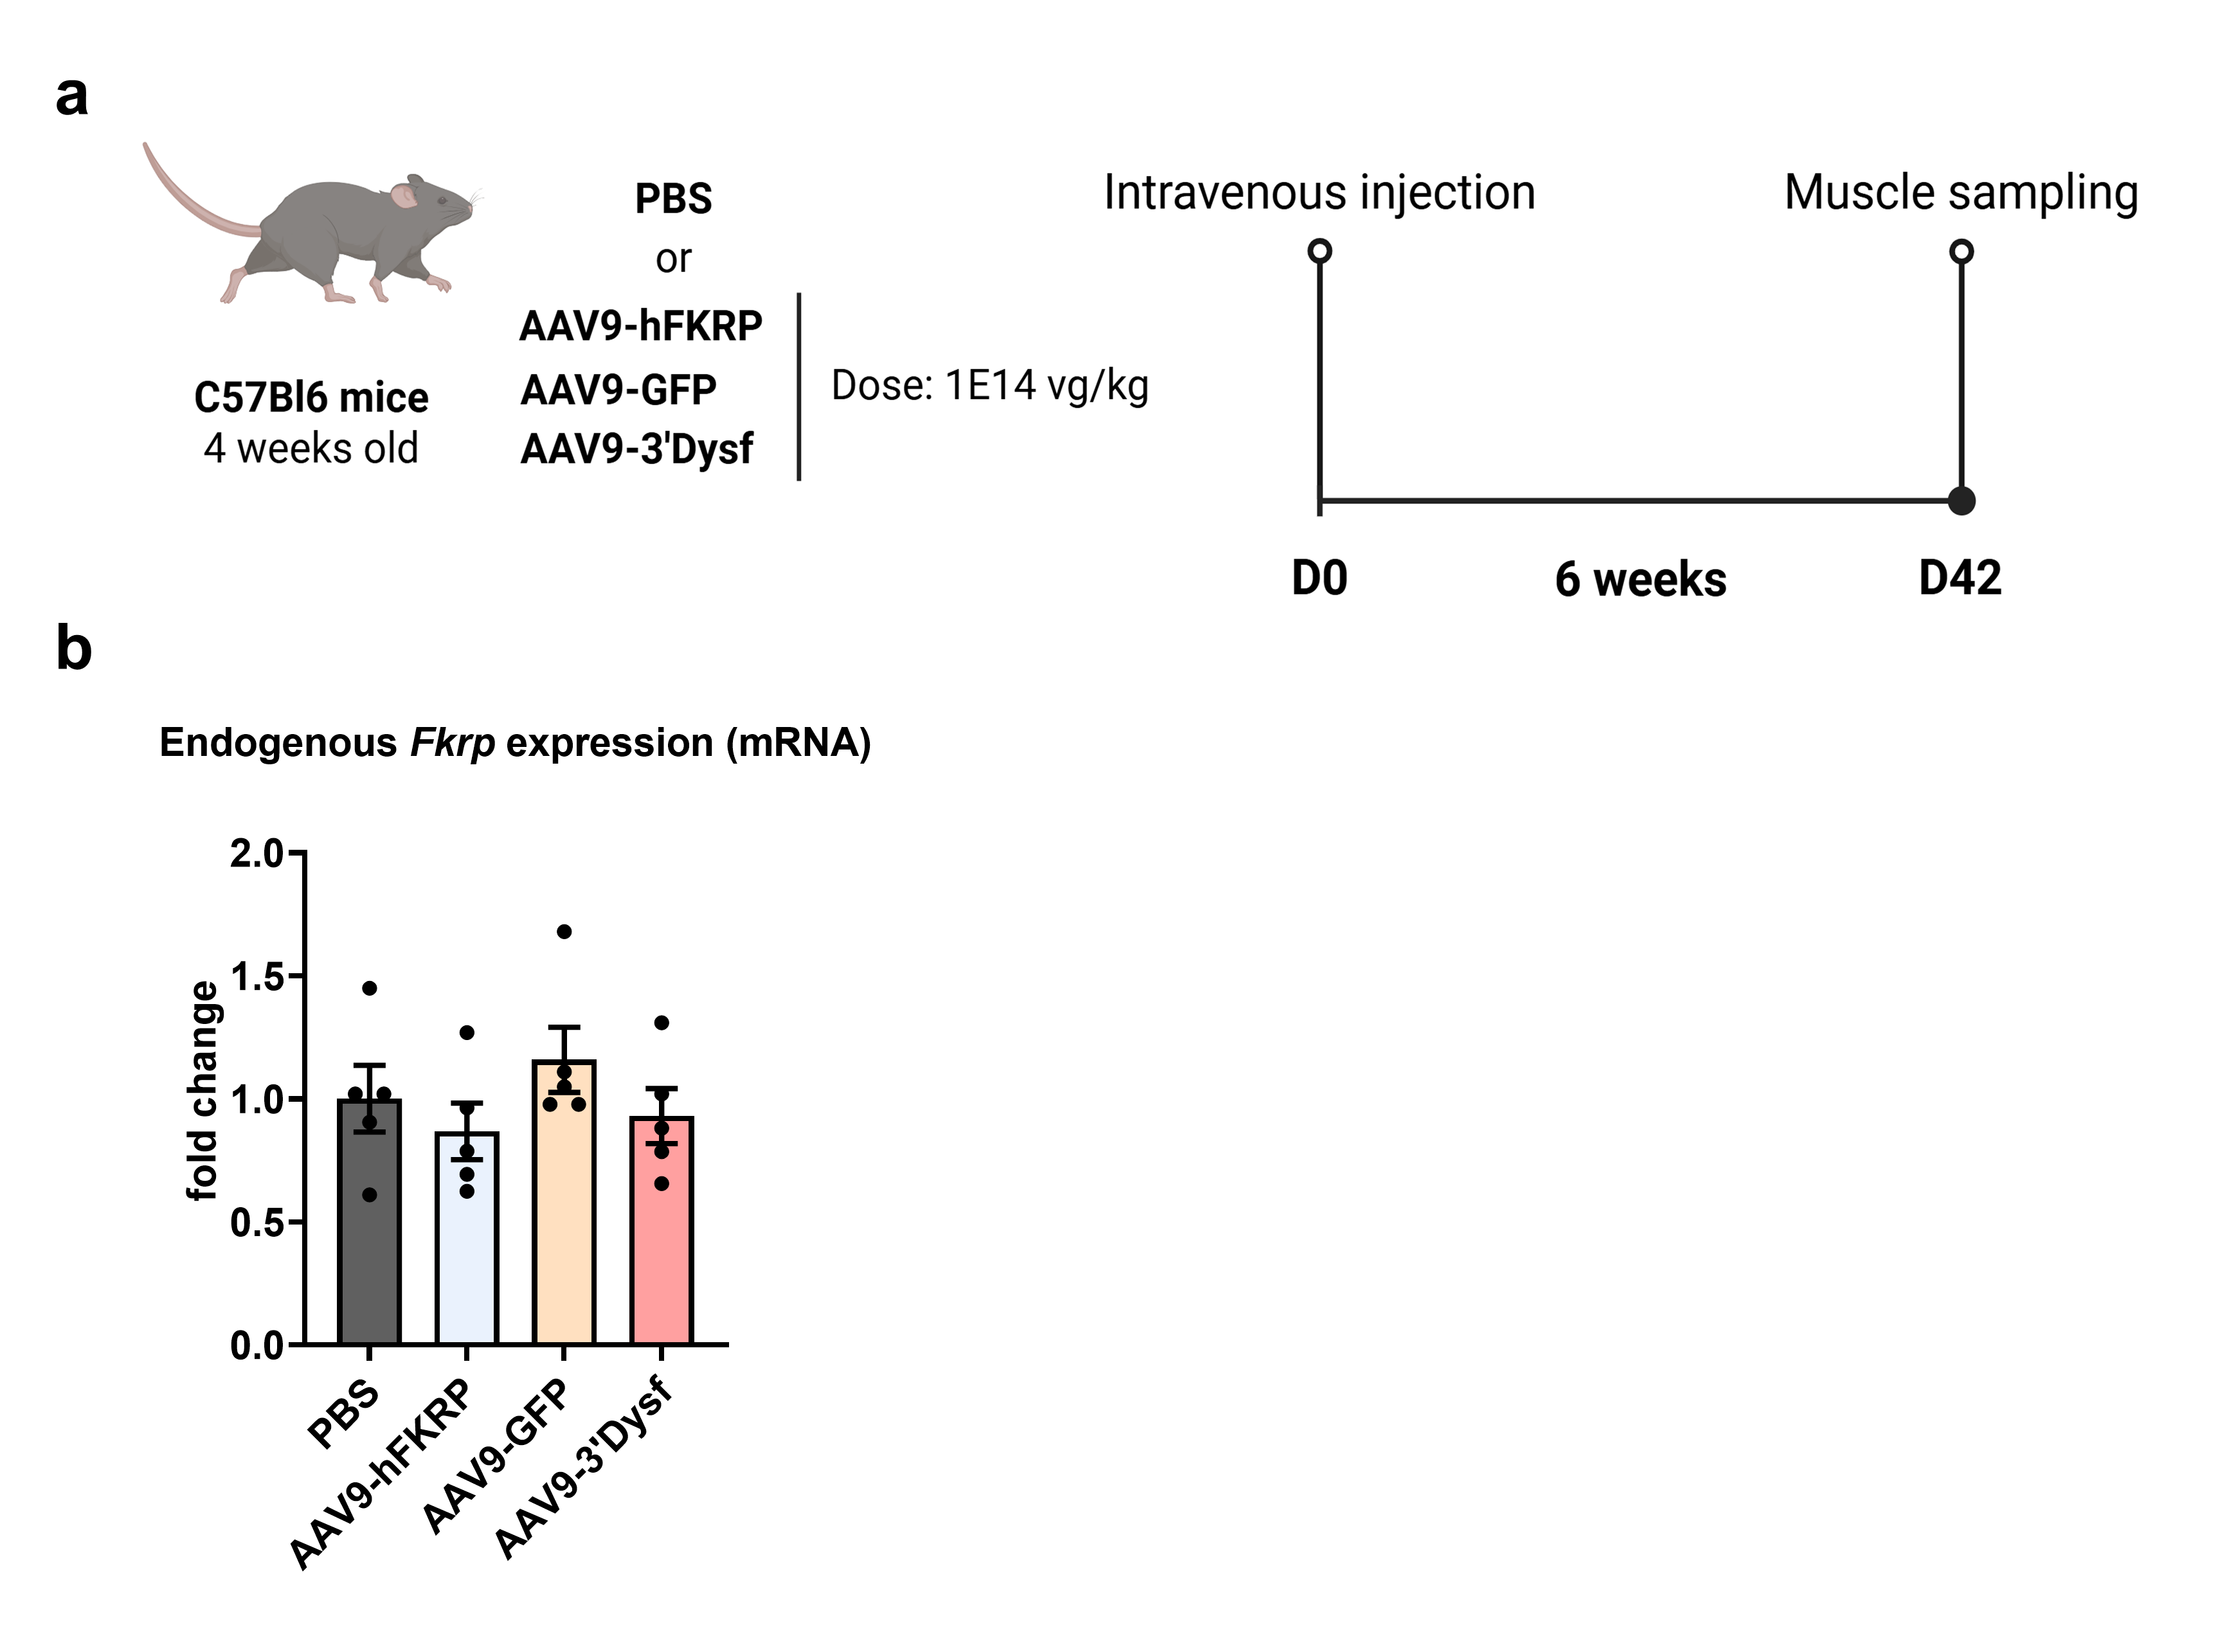


**Fig. S3** Representative images of TA muscle cross sections immunostained for laminin, CD11b (top) and CD4 (bottom). Scale bars, 200 μm and 100 μm (zoomed-in images)


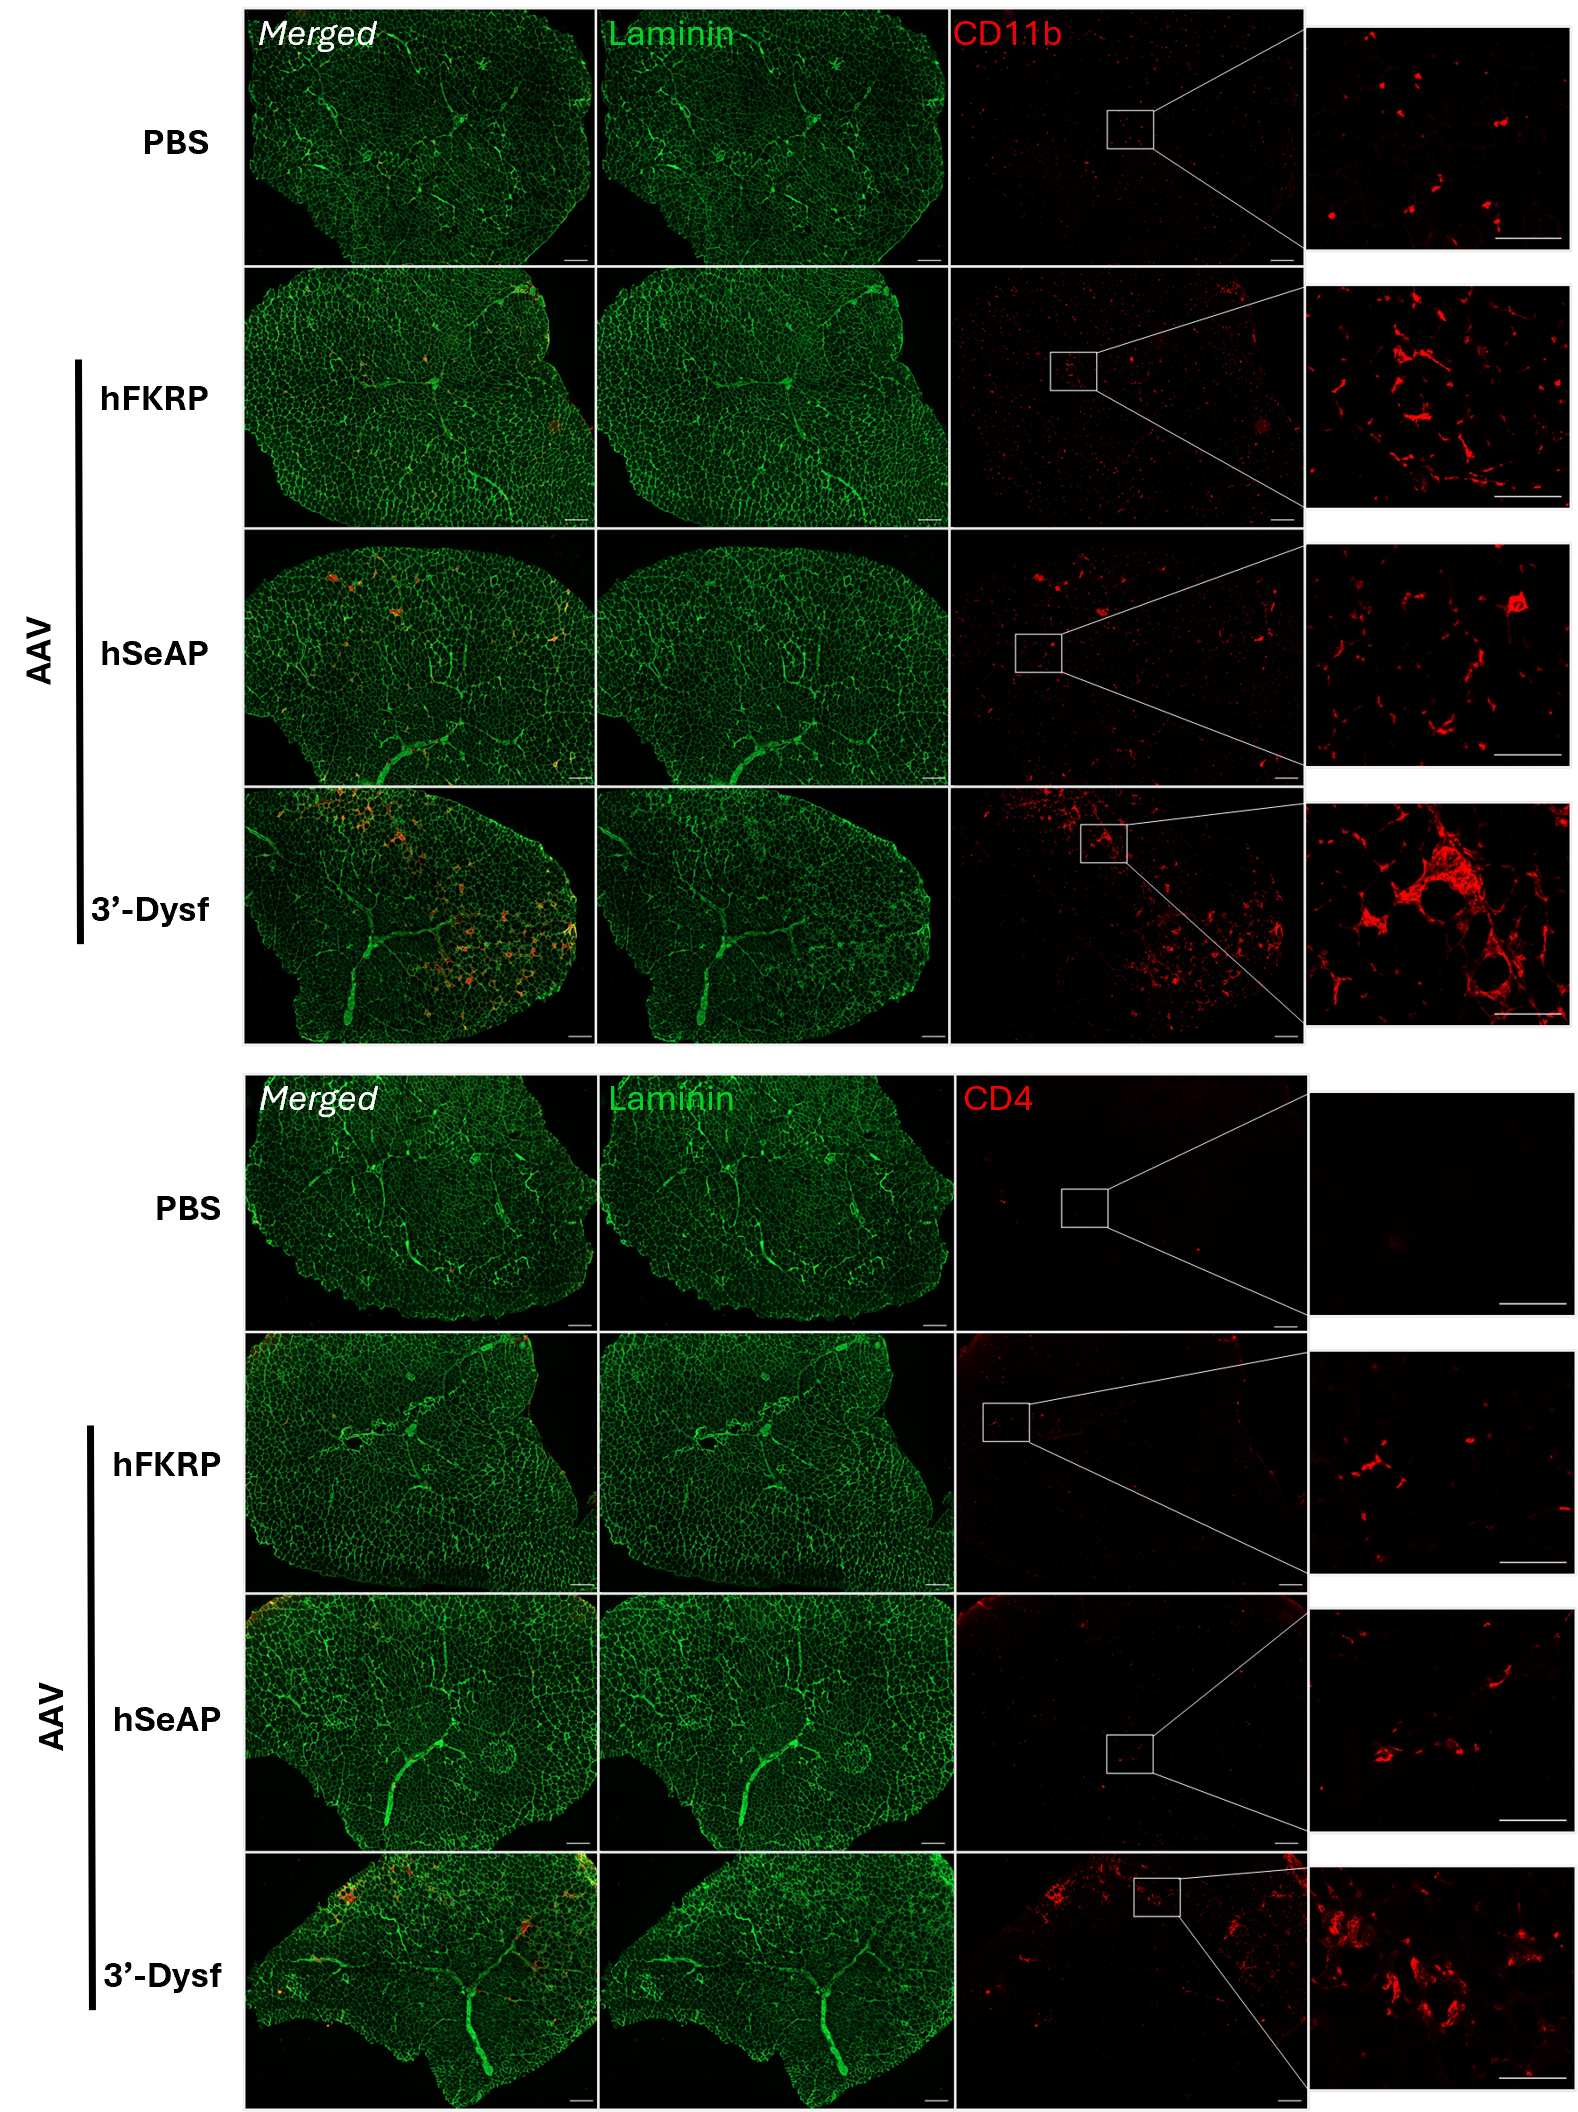


**Fig. S4** Prednisolone treatment effect on IFNg/TNFa stimulated C2C12 myoblasts. Quantification of *Fkrp*, *Irf1*, *Il6*, *Ccl2* and *Ccl5* mRNA by RT-qPCR following cytokine treatment alone or associated with increasing doses of Prednisolone (10, 50 and 100 µM), shown as FC relative to control treated C2C12 myoblasts, normalized to *Rplp0.* Analysis was performed using one-way ANOVA. Data are shown as mean ± standard error of the mean (n = 3 biological replicates). ns, not significant, *p<0.05, **p<0.01, ***p<0.001


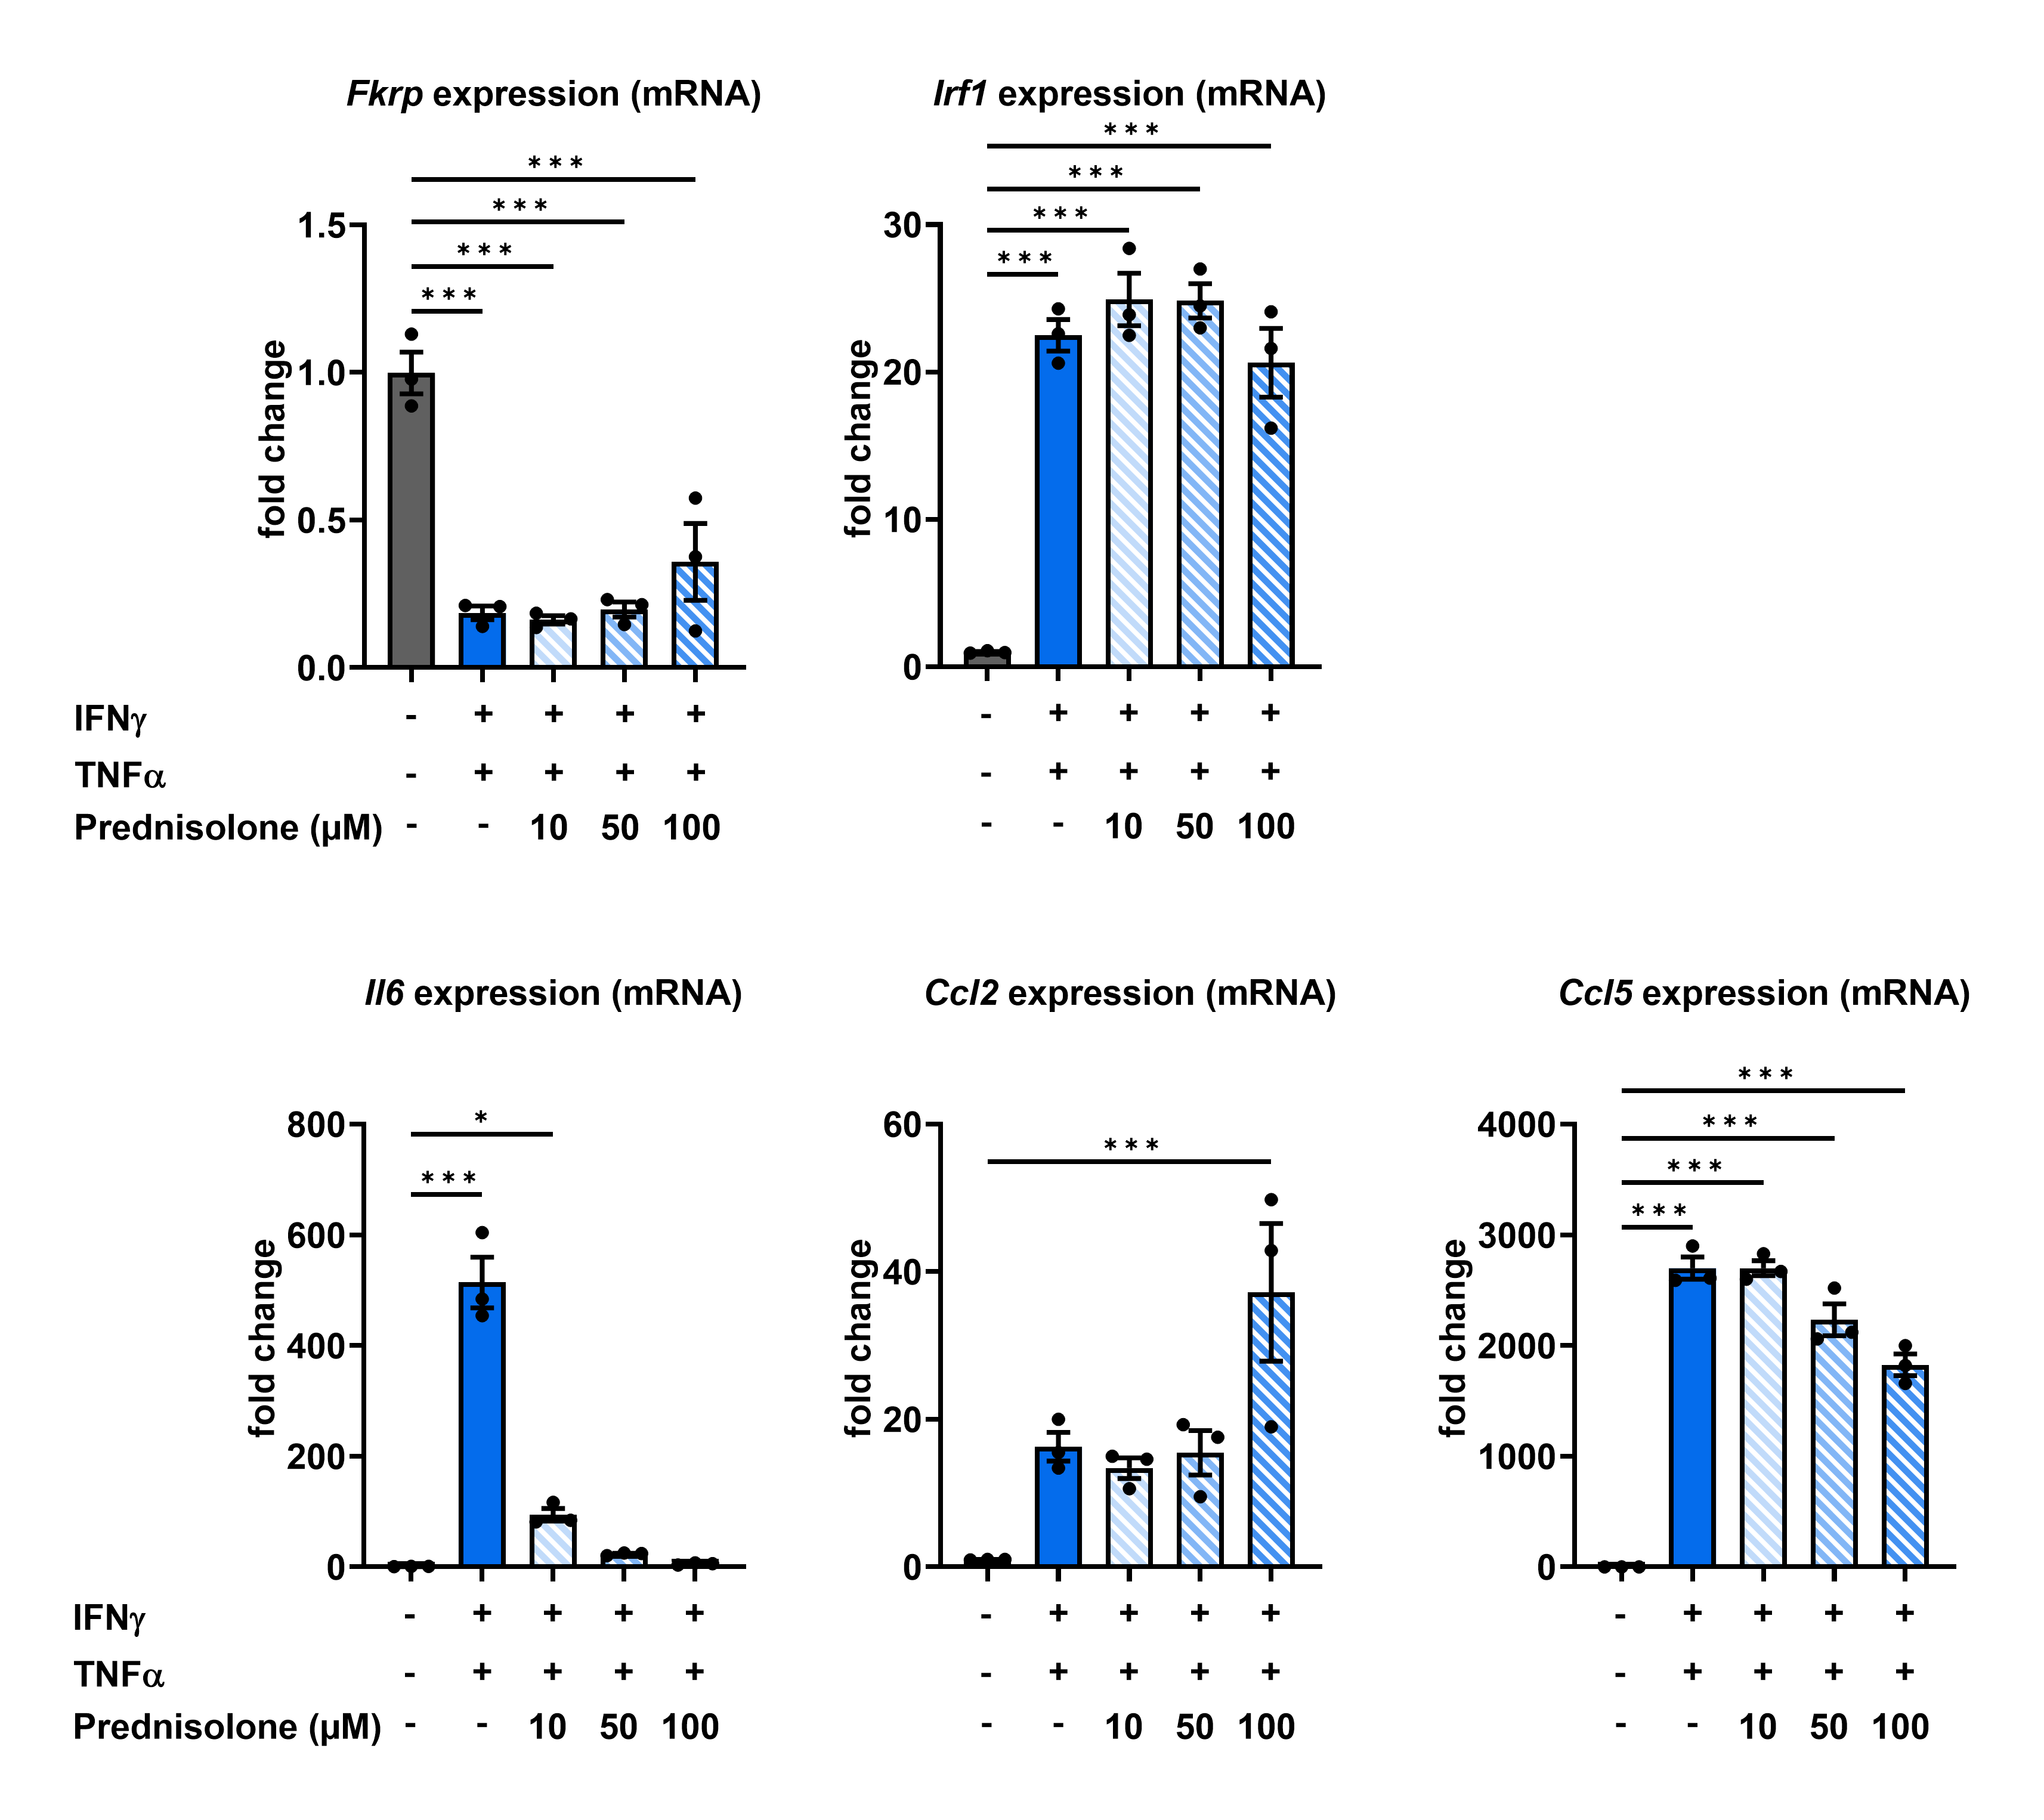


**Table S1: List of genes included in IFNg / TNFa synergy stimulation geneset**

| [30,32,33,51–54] | |
| --- | --- |
| Acod1 | Il1b |
| Adam17 | Il6 |
| Arg1 | Irf1 |
| Bcl2l11 | Irf7 |
| Casp8 | Irf9 |
| Ccl2 | Jak1 |
| Ccl3 | Jak2 |
| Ccl4 | Jun |
| Ccl5 | Map3k7 |
| Ciita | Mapk14 |
| Cxcl10 | Mapk8 |
| Cxcl11 | Mmp3 |
| Cxcl9 | Mmp9 |
| Erap1 | Mx1 |
| Fas | Nfkb1 |
| Fbxo21 | Nfkb2 |
| Fbxo30 | Nos2 |
| Fbxo32 | Oas1 |
| Fos | Oas2 |
| Gbp1 | Psmb8 |
| Gbp2 | Psmb9 |
| Gbp5 | Rela |
| H2-Aa | Ripk1 |
| H2-Ab1 | Rsad2 |
| H2-D | Sele |
| H2-DMa | Sell |
| H2-DMb1 | Slc7a5 |
| H2-DMb2 | Socs1 |
| H2-Ea | Socs3 |
| H2-Eb1 | Stat1 |
| H2-Eb2 | Tap1 |
| H2-K | Tap2 |
| H2-L | Tnfaip3 |
| H2-Oa | Tnfaip6 |
| H2-Ob | Tnfrsf1a |
| H2-Q10 | Tnfrsf1b |
| H2-Q7 | Tradd |
| H2-T22 | Traf2 |
| H2-T23 | Trim21 |
| Hif1a | Trim25 |
| Icam1 | Trim32 |
| Ido1 | Trim63 |
| Ifit1 | Vcam1 |
| Ifit2 | Xiap |
| Il12b |  |

**Table S2: List of molecules used for drug screening**

| **Drug** | **Effect** |
| --- | --- |
| Mycophenolic acid (MPA) | Antiviral, immunosuppresive |
| Rosiglitazone | PPARg agonist |
| Ginsenoside Rd | Inhibits TNF-α-induced NF-κB transcriptional activity |
| Setanaxib | Selective NADPH oxidase (NOX1/4) inhibitor |
| Resveratrol | Anti-oxidant, anti-inflammatory, cardioprotective, anti-cancer |
| Empagliflozin | Selective sodium glucose cotransporter-2 (SGLT-2) inhibitor |
| Sildenafil | Phosphodiesterase type 5 (PDE5) inhibitor |
| A-769662 | AMP-activated protein kinase (AMPK) activator |
| Pyridone 6 | Pan-JAK inhibitor |
| Prednisolone | Anti-inflammatory and immunosuppressive |
| Deflazacort | Anti-inflammatory and immunosuppressive |
| Rapamycin | Specific mTOR inhibitor |
| Vamorolone | Anti-inflammatory |

**Table S3: List of primers and probes**

| **Application** | **Gene** | **Forward (5’-3’)** | | **Reverse (5’-3’)** | | **Probe (for Taqman qPCR)** |
| --- | --- | --- | --- | --- | --- | --- |
| TaqMan RTqPCR | Rplp0 (P0) | CTCCAAGCAGATGCAGCAGA | | ATAGCCTTGCGCATCATGGT | | CCGTGGTGCTGATGGGCAAGAA |
| FKRP transgene | CAGTGCAGGCTGCCTATCAG | | TGTGGGCCAGGGCATTAG | | AAGTGGTGGCTGGTGTG |
| rAAV titration qPCR | HBB2 polyA | CCAGGCGAGGAGAAACCA | | CTTGACTCCACTCAGTTCTCTTGCT | | CTCGCCGTAAAACATGGAAGGAACACTTC |
| Vector copy number qPCR | HBB2 polyA | CCAGGCGAGGAGAAACCA | | CTTGACTCCACTCAGTTCTCTTGCT | | CTCGCCGTAAAACATGGAAGGAACACTTC |
| Titin-Mex5 | TTCAGTCATGCTGCTAGCGC | | AAAACGAGCAGTGACGTGAGC | | TGCACGGAAGCGTCTCGTCTCAGTC |
| TaqMan Gene Expression assays (Thermofisher) | | | **Gene** | | **Ref.** | |
| Fkrp | | Mm00557870_m1 | |
| Fktn | | Mm00519882_m1 | |
| Ispd | | Mm04212666_m1 | |
| Pomgnt1 | | Mm01188547_m1 | |
| Pomt1 | | Mm00520170_m1 | |
| Large1 | | Mm00521885_m1 | |
| Dag1 | | Mm00802400_m1 | |
| Ifng | | Mm01168134_m1 | |
| Tnfa | | Mm00443258_m1 | |
| Il6 | | Mm00446190_m1 | |
| Ccl2 | | Mm00441242_m1 | |
| Ccl5 | | Mm01302427_m1 | |
| Irf1 | | Mm01288580_m1 | |

**Table S4: List of primary antibodies used for WB or IHF**

| **Protein** | **Supplier** | **Reference** | **Species** | **Application** | **Dilution** |
| --- | --- | --- | --- | --- | --- |
| **FKRP** | In house | In house | Rabbit | WB | 1/100 |
| **β-actin** | Sigma-Aldrich | A1978 | Mouse | WB | 1/300 |
| **alpha-DG** | DSHB | IIH6C4-S | Mouse | WB | 1/50 |
| **beta-DG** | DSHB | MANDAG2 | Mouse | WB | 1/200 |
| **CD11b** | BD Pharmingen | 550282 | Rat | IHF | 1/40 |
| **CD68** | Bio-Rad | MCA1957 | Rat | IHF | 1/500 |
| **CD4** | BD Pharmingen | 550280 | Rat | IHF | 1/40 |
| **CD8** | Thermo Fisher | MA5-17594 | Rat | IHF | 1/40 |

30. Karki R, Sharma BR, Tuladhar S, Williams EP, Zalduondo L, Samir P, et al. Synergism of TNF-α and IFN-γ Triggers Inflammatory Cell Death, Tissue Damage, and Mortality in SARS-CoV-2 Infection and Cytokine Shock Syndromes. Cell. 2021;184:149-168.e17. https://doi.org/10.1016/j.cell.2020.11.025

32. Ma JF, Sanchez BJ, Hall DT, Tremblay AK, Di Marco S, Gallouzi I. STAT 3 promotes IFN γ/ TNF α‐induced muscle wasting in an NF ‐κB‐dependent and IL ‐6‐independent manner. EMBO Mol Med. 2017;9:622–37. https://doi.org/10.15252/emmm.201607052

33. Zhang F, Mears JR, Shakib L, Beynor JI, Shanaj S, Korsunsky I, et al. IFN-γ and TNF-α drive a CXCL10+ CCL2+ macrophage phenotype expanded in severe COVID-19 lungs and inflammatory diseases with tissue inflammation. Genome Med. 2021;13:64. https://doi.org/10.1186/s13073-021-00881-3

51. Paludan SR. Synergistic action of pro-inflammatory agents: cellular and molecular aspects. J Leukoc Biol. 2000;67:18–25. https://doi.org/10.1002/jlb.67.1.18

52. Qiao Y, Giannopoulou EG, Chan CH, Park S, Gong S, Chen J, et al. Synergistic Activation of Inflammatory Cytokine Genes by Interferon-γ-Induced Chromatin Remodeling and Toll-like Receptor Signaling. Immunity. 2013;39:454–69. https://doi.org/10.1016/j.immuni.2013.08.009

53. Ohmori Y, Schreiber RD, Hamilton TA. Synergy between Interferon-γ and Tumor Necrosis Factor-α in Transcriptional Activation Is Mediated by Cooperation between Signal Transducer and Activator of Transcription 1 and Nuclear Factor κB. J Biol Chem. 1997;272:14899–907. https://doi.org/10.1074/jbc.272.23.14899

54. Woznicki JA, Saini N, Flood P, Rajaram S, Lee CM, Stamou P, et al. TNF-α synergises with IFN-γ to induce caspase-8-JAK1/2-STAT1-dependent death of intestinal epithelial cells. Cell Death Dis. 2021;12:864. https://doi.org/10.1038/s41419-021-04151-3
